# Supplementary material
Source: publisher figshare collection journal article supplement (https://frontiersin.figshare.com/ndownloader/files/26899361)
Supplement: Supplementary file [file 26899361]

## Supplementary Material

**Supplementary Table 1** Patient Demographics and Location of Their Arteriovenous Malformation

| Patient | Age | Sex | Anatomical Location |
|---------|-----|-----|---------------------|
| 1       | 22  | F   | Forehead/scalp      |
| 2       | 32  | F   | Lower lip/chin      |
| 3       | 65  | F   | Upper lip           |
| 4       | 54  | F   | Nose                |
| 5       | 19  | M   | Foot                |
| 6       | 44  | F   | Scalp/ear           |
| 7       | 17  | F   | Foot                |
| 8       | 48  | M   | Hand                |
| 9       | 17  | M   | Foot                |
| 10      | 20  | M   | Forearm             |
| 11      | 17  | M   | Foot                |
| 12      | 58  | M   | Hand                |

F, female; M, male

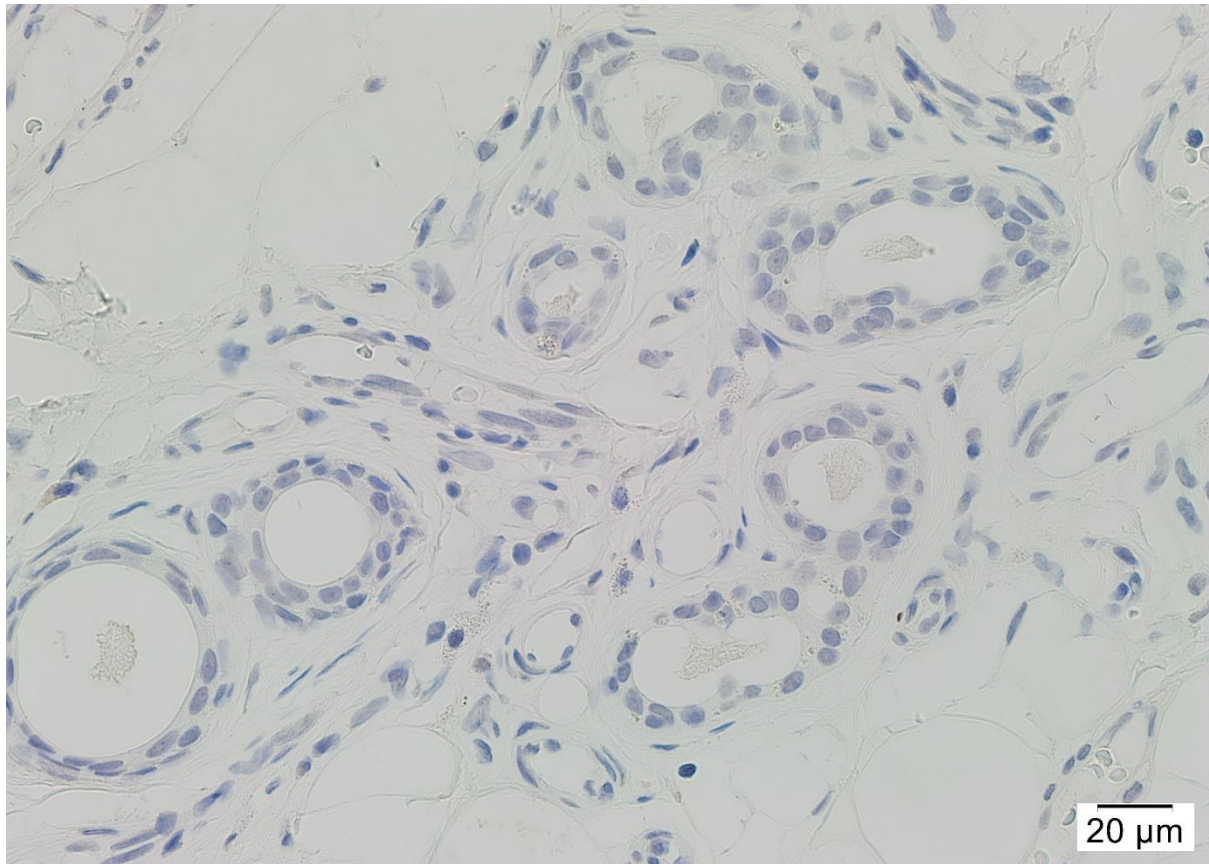

**Supplementary Figure 1.** Representative immunohistochemical-stained sections of arteriovenous malformation tissue samples, demonstrating no expression of NANOG (*brown*) on the *nidus*. Nuclei were counterstained with hematoxylin (blue). Original magnification: 400x.



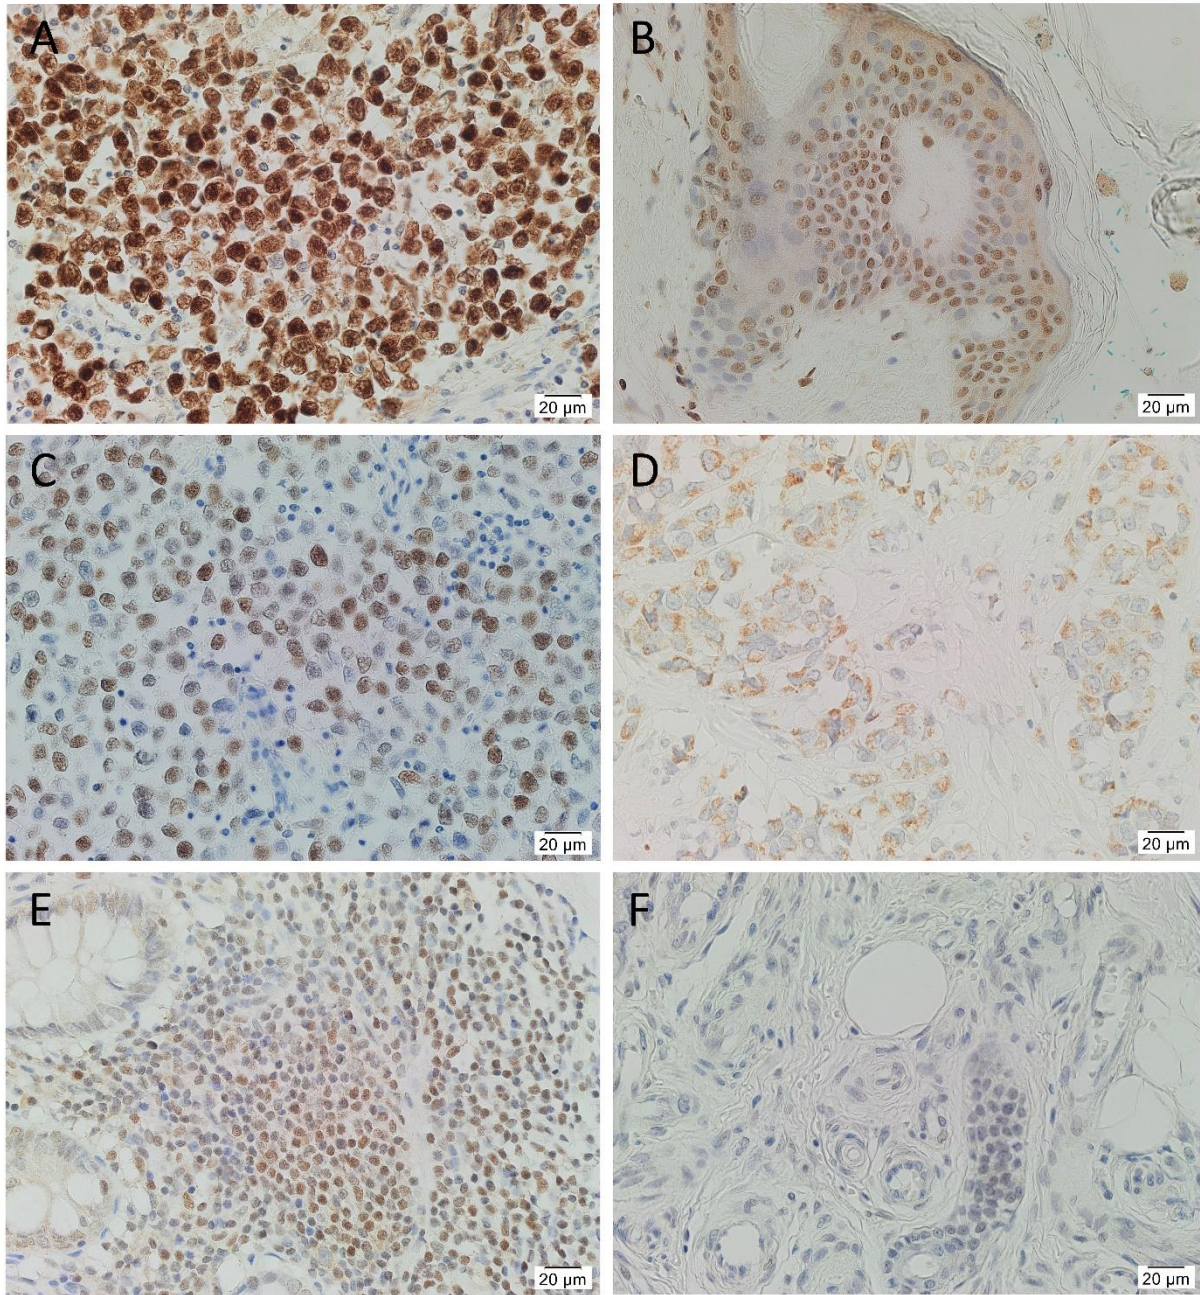

**Supplementary Figure 2.** Representative immunohistochemical-stained sections of human control tissues: seminoma for OCT4 (**A**, brown), skin (sweat glands) for SOX2 (**B**, brown), seminoma for NANOG (**C**, brown), breast carcinoma for KLF4 (**D**, brown) and normal colon for c-MYC (**E**, brown). Negative control performed on a section of arteriovenous malformation omitting the primary antibody showed no staining, confirming the specificity of the secondary antibody (**F**). Nuclei were counterstained with hematoxylin (**A-F**, blue). Original magnification: 400x.



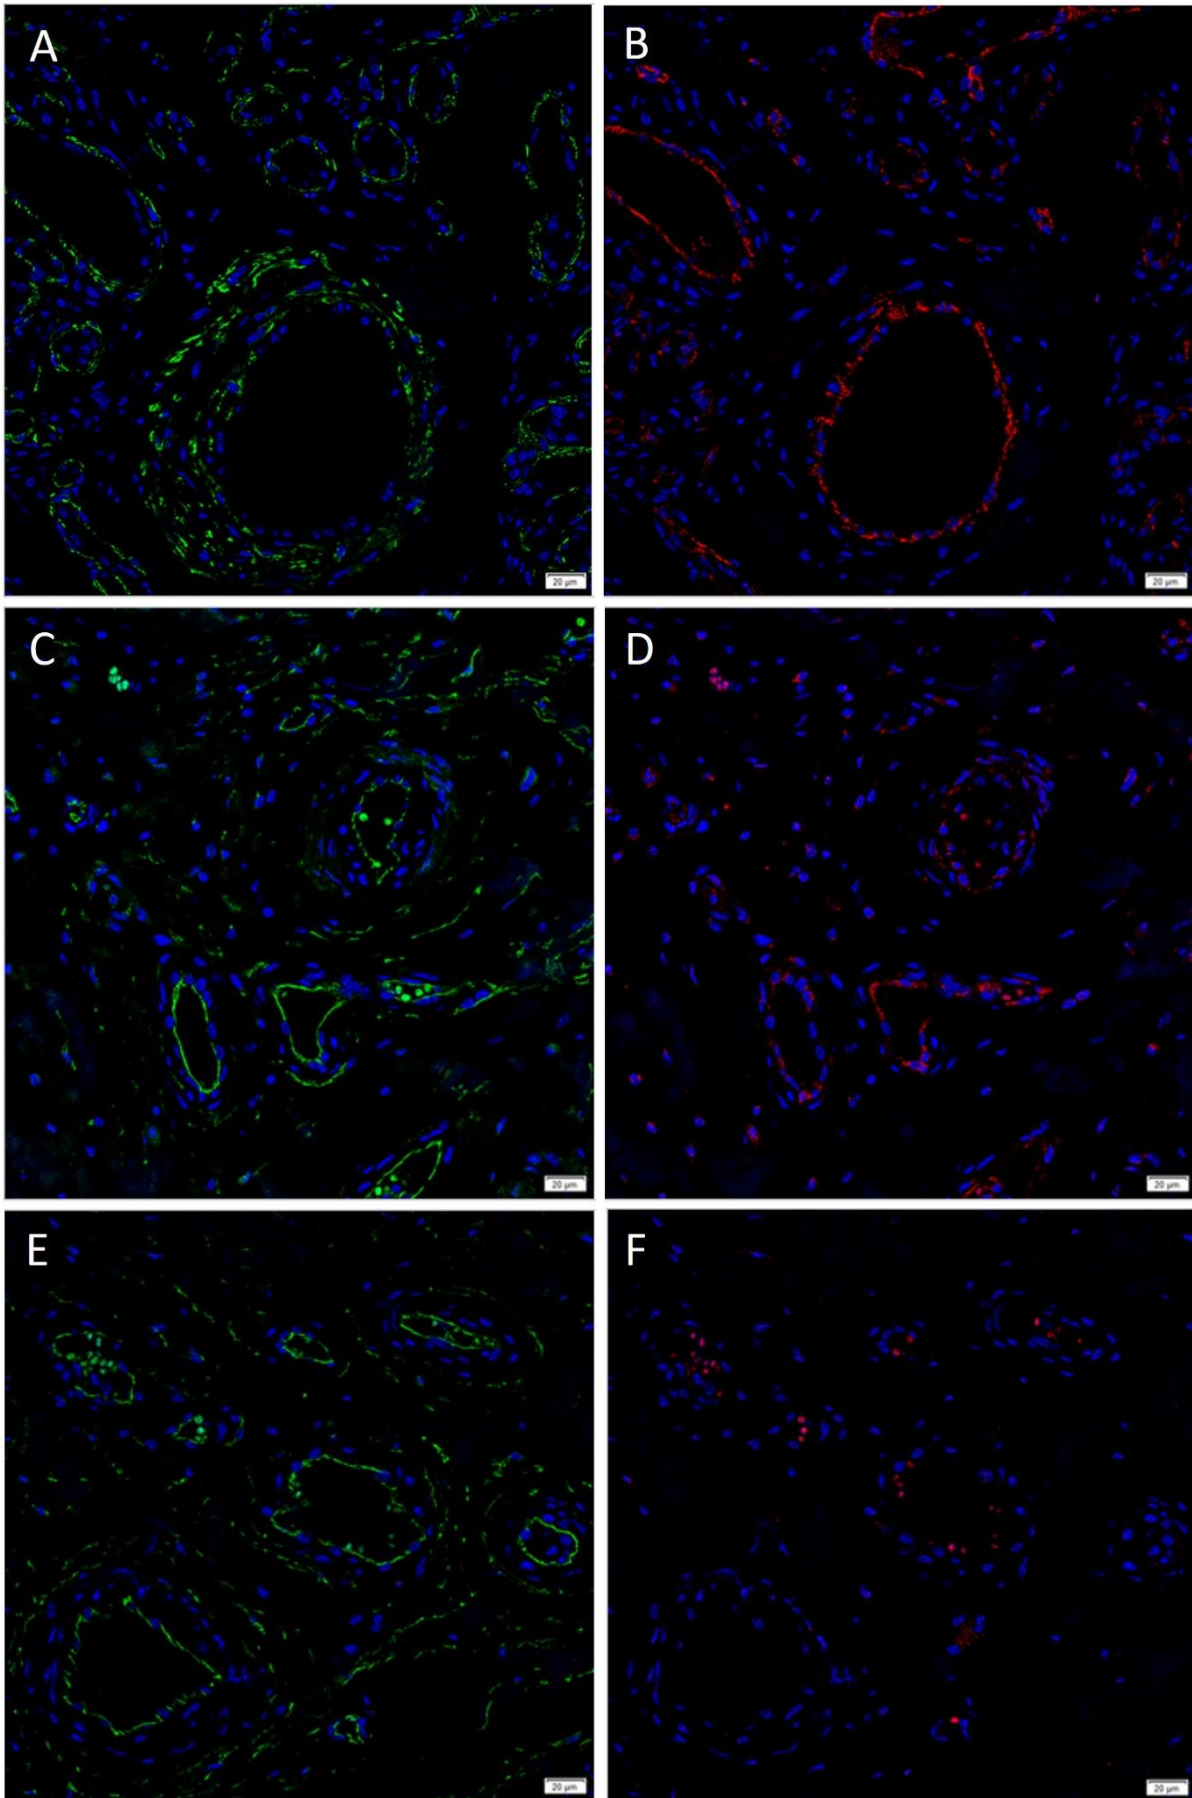

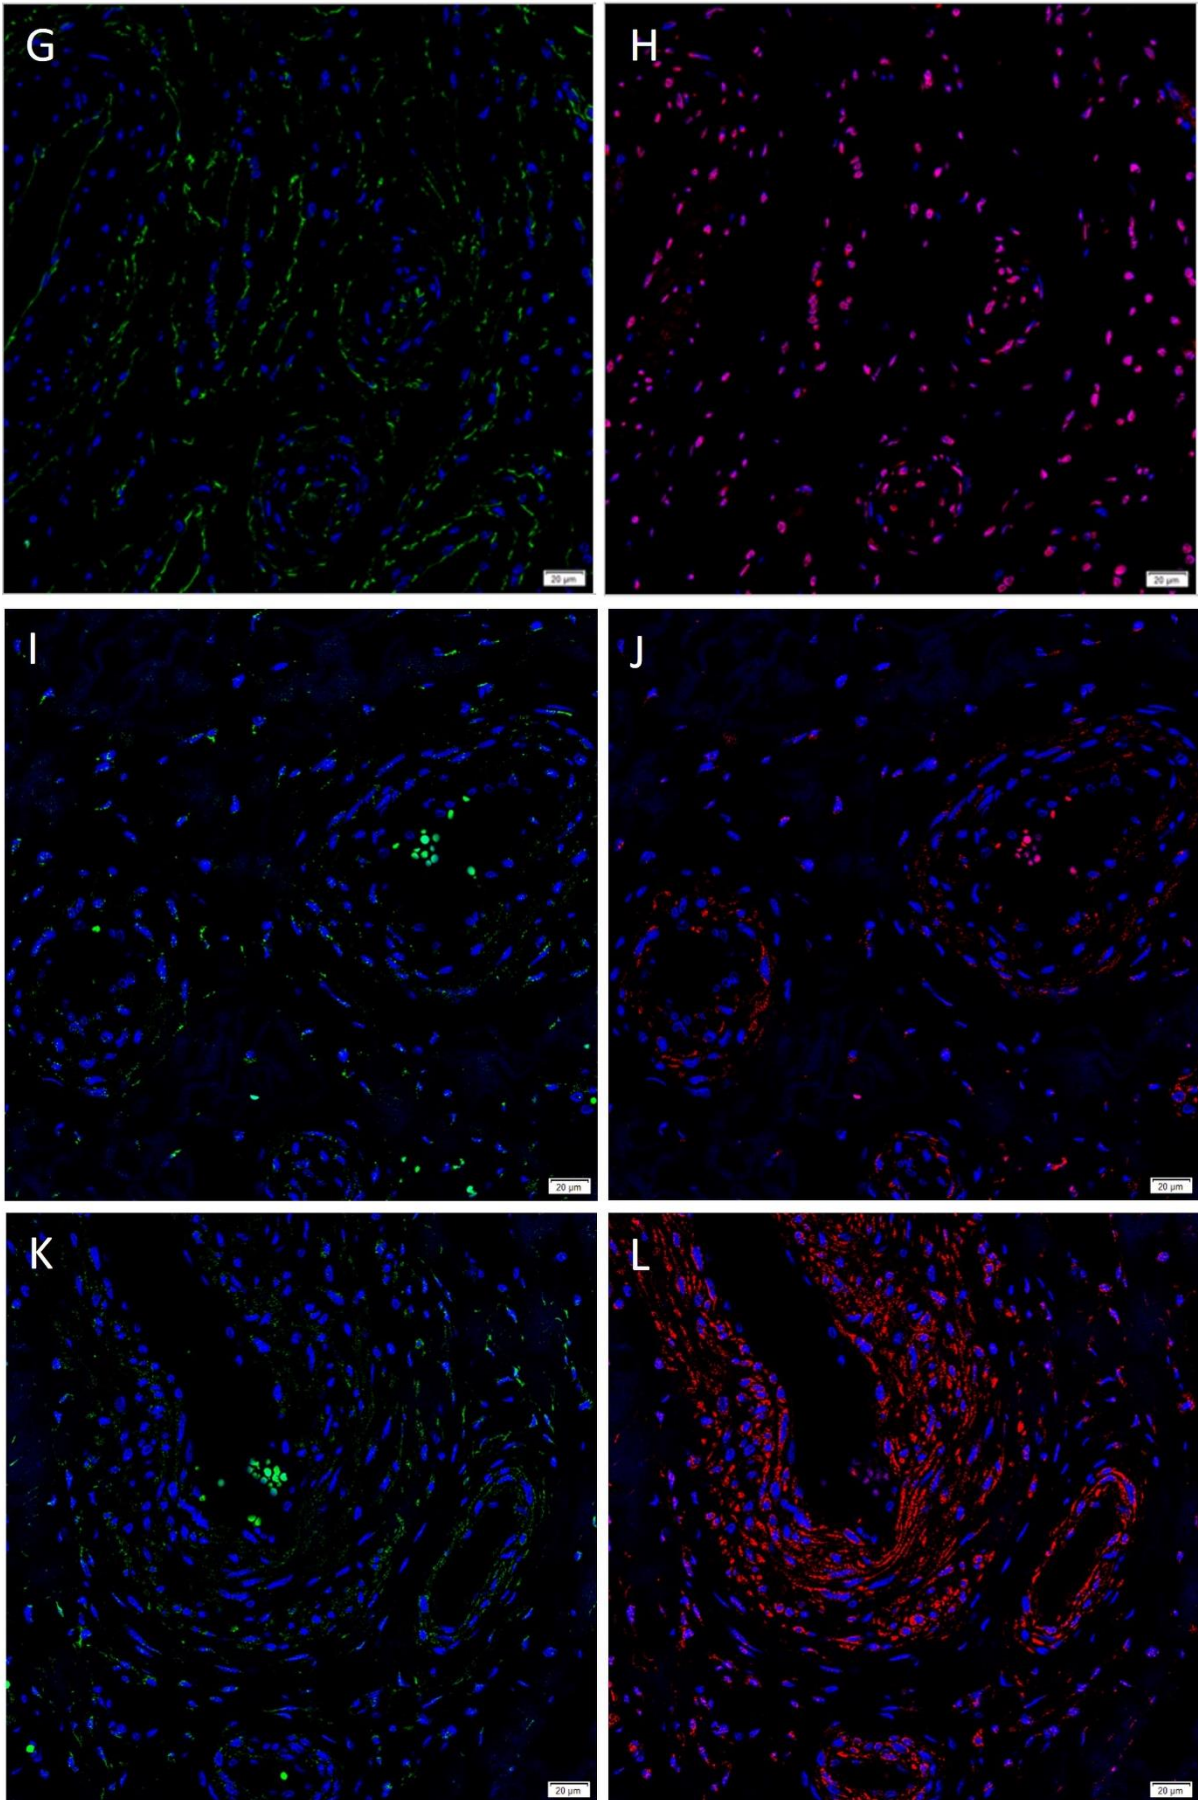



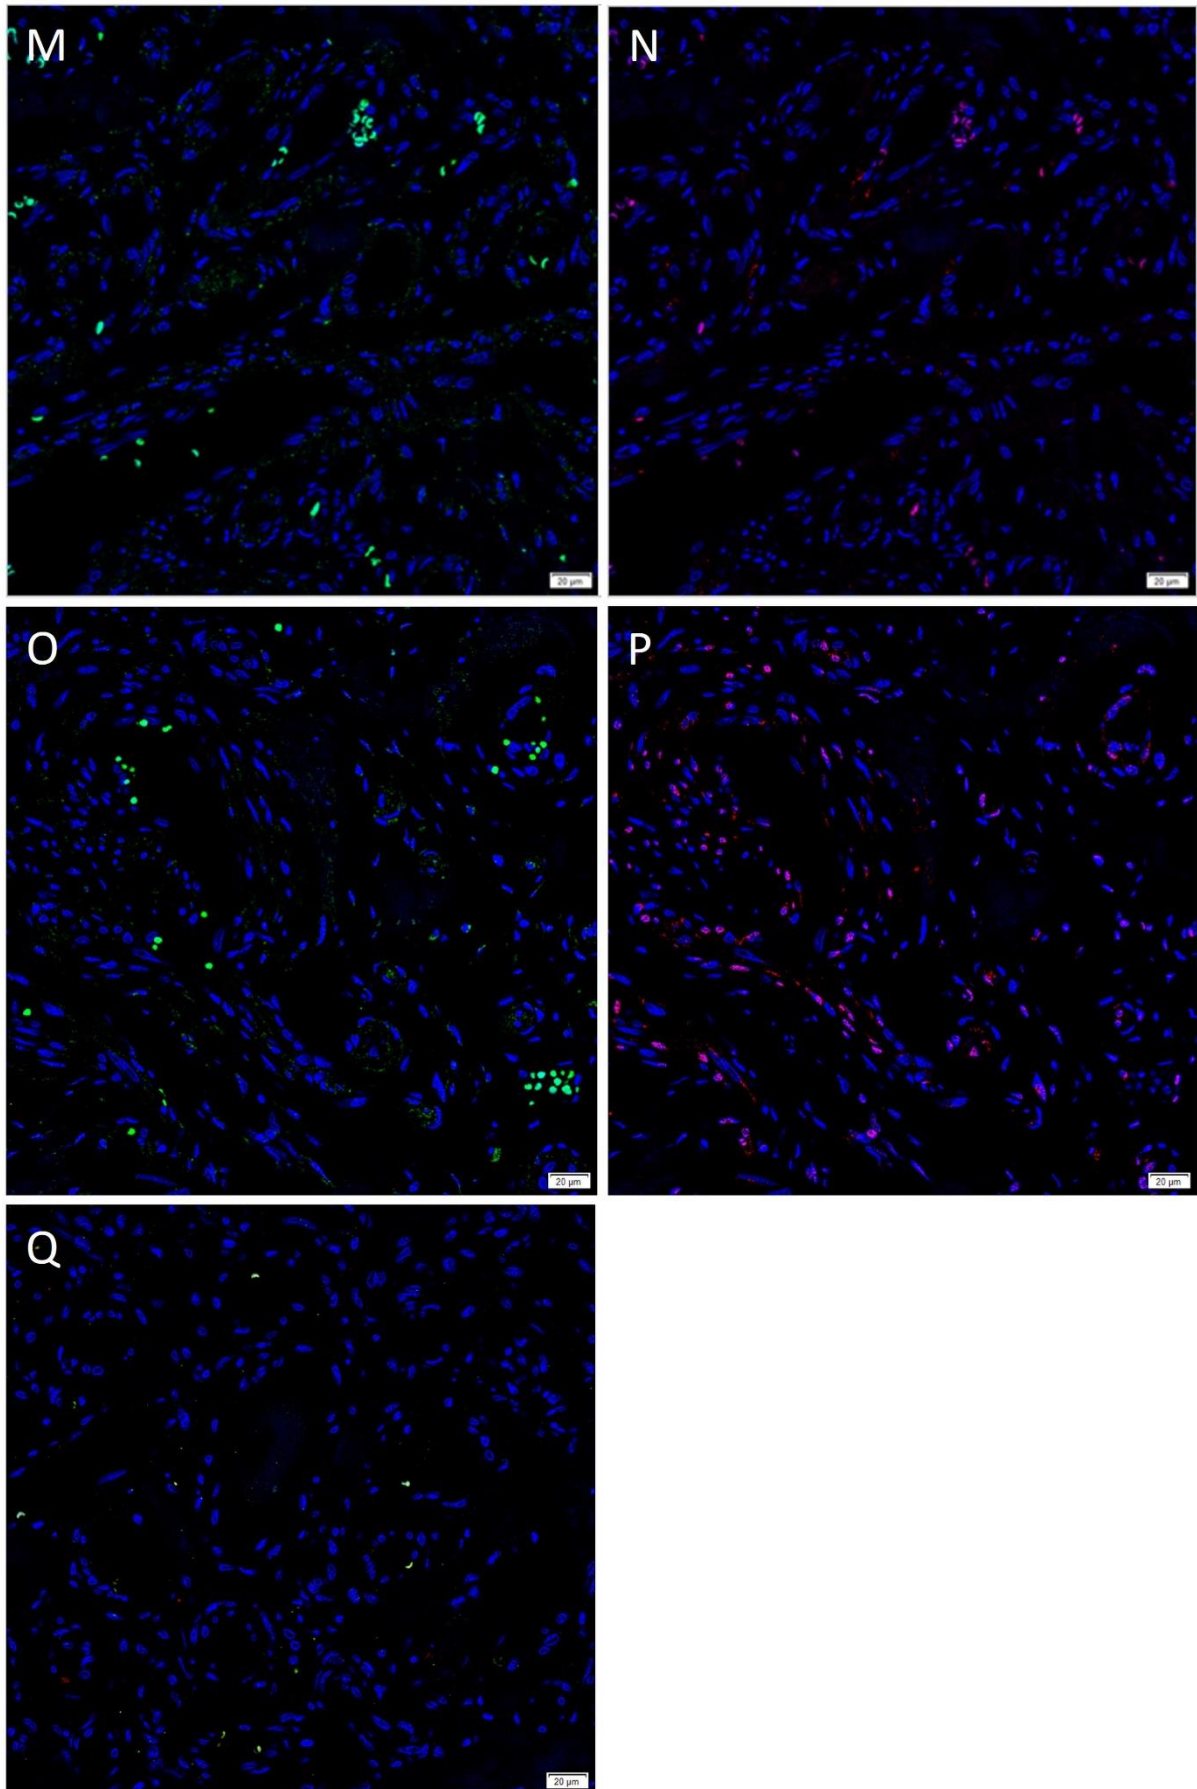

**Supplementary Figure 3.** Split images of immunofluorescence-stained sections of arteriovenous malformation tissue samples demonstrated in Figure 3, showing the expression of SMA (**A**, green) and vWF (**B**, red); OCT4 (**C**, red) and KLF4 (**D**, green); CD34 (**E**, green) and NANOG (**F**, red); CD34 (**G**, green) and SOX2 (**H**, red); OCT4 (**I**, green) and KLF4 (**J**, red); c-MYC (**K**, green) and KLF4 (**L**, red); OCT4 (**M**, green) and NANOG (**N**, red); c-MYC (**O**, green) and SOX2 (**P**, red). Negative control (**Q**) performed on a section of an arteriovenous malformation showed the specificity of the fluorescent secondary antibodies. Cell nuclei were counterstained with 4',6-diamidino-2-phenylindole (**A-Q**, blue). Original magnification: 400x.

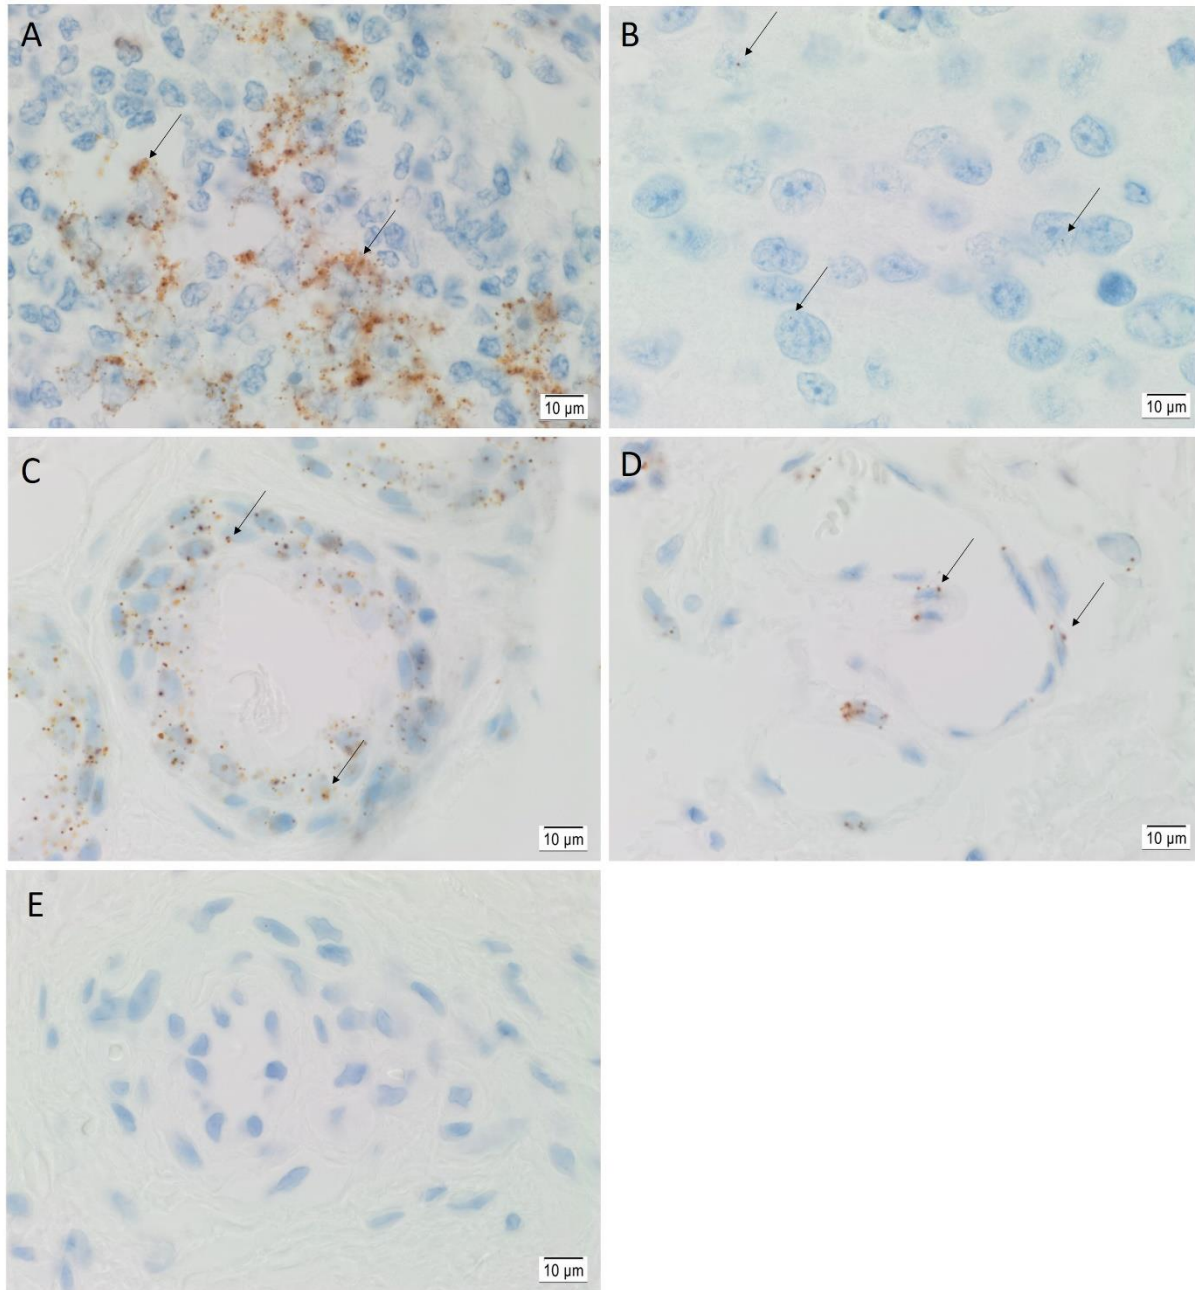

**Supplementary Figure 4.** Human positive control tissues for *in situ* hybridization: seminoma for OCT4 (**A**, brown, *arrows*), melanoma for SOX2 (**B**, brown, *arrows*), skin (sweat glands) for KLF4 (**C**, brown, *arrows*) and colon for c-MYC (**D**, brown, *arrows*). Background level of transcript was assessed with the negative control showing minimal staining (**E**). Nuclei were counterstained with hematoxylin (**A-E**, blue). Original magnification: 1000x.



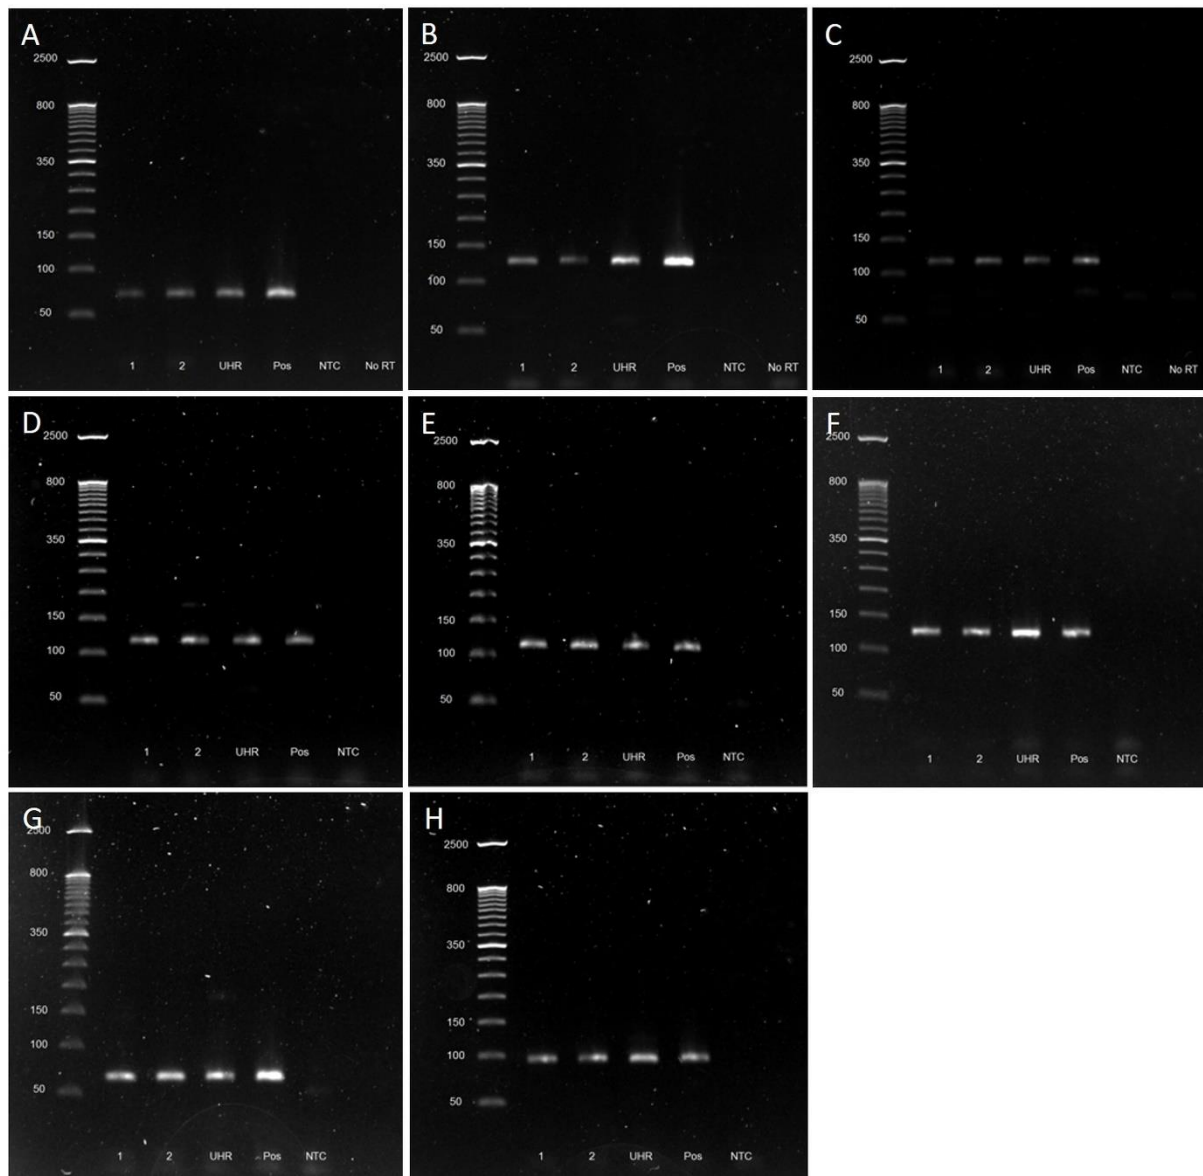

**Supplementary Figure 5.** Reverse transcription quantitative polymerase chain reaction amplification products from two arteriovenous malformation derived primary cell lines were checked using agarose gel electrophoresis. Probe specificity was confirmed for OCT4 (**A**, 64bp), NANOG (**B**, 109bp), SOX2 (**C**, 91bp), KLF4 (**D**, 110bp) and c-MYC (**E**, 107bp), and the reference genes GAPDH (**F**, 122bp), PSMB4 (**G**, 63bp), and PUM1 (**H**, 63bp) were also checked. Ladder refers to the DNA marker in base pairs (bp); Lanes 1 and 2 refer to the respective cell lines; UHR, universal human RNA; Pos, positive control (NTERA2 cell lines); NTC, no template control (RNase-free water) to confirm no contamination; No RT, reverse transcription negative control for primers that may detect genomic DNA.
